# Supplementary material for: Conditional CRISPR-Cas Genome Editing in Drosophila to Generate Intestinal Tumors
Source: MDPI journal article supplement (doi:10.3390/cells10113156), 2021-11-13
Supplement: s1 [file s1]

**Supplementary Materials:** The following are available online at [www.mdpi.com/xxx/s1](http://www.mdpi.com/xxx/s1), Figure S1: title, Table S1: title, Video S1: title.

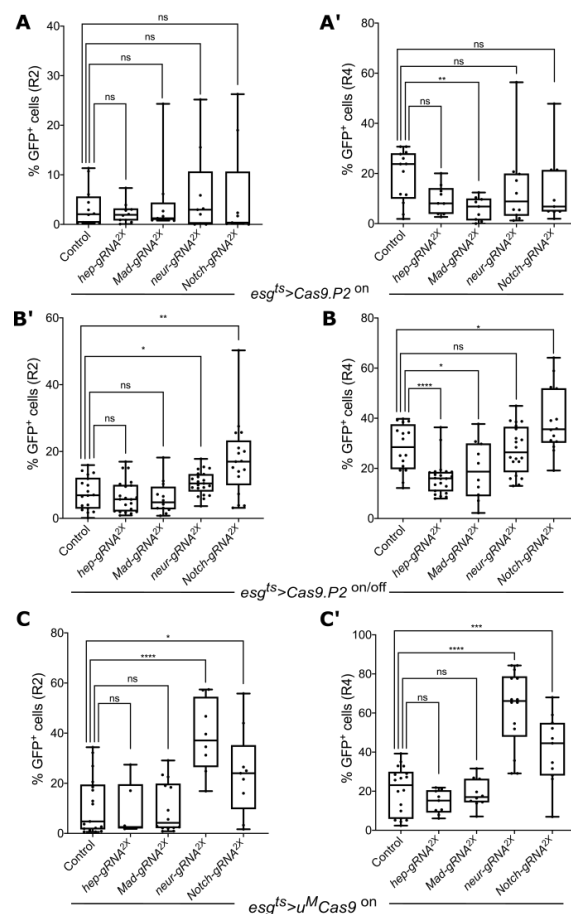

**Figure S1.** Boxplot representation of GFP<sup>+</sup> cells after perturbation of the BMP, Notch and JNK pathways. (A-C) Quantification of GFP<sup>+</sup> cells with either *Cas9.P2<sup>on</sup>* (A, A'), *Cas9.P2<sup>on/off</sup>* (B, B') and *u<sup>M</sup>Cas9<sup>on</sup>* (C, C') with different gRNAs in both the R2 and R4 regions of the intestine.

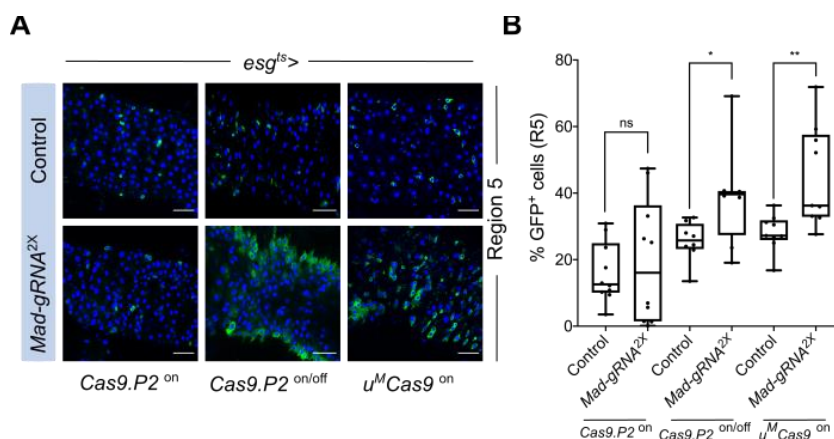

**Figure S2.** Quantification of GFP<sup>+</sup> cells in the R5 region when Mad is perturbed with different Cas9 enzymes. Scale Bar: 30  $\mu$ m.

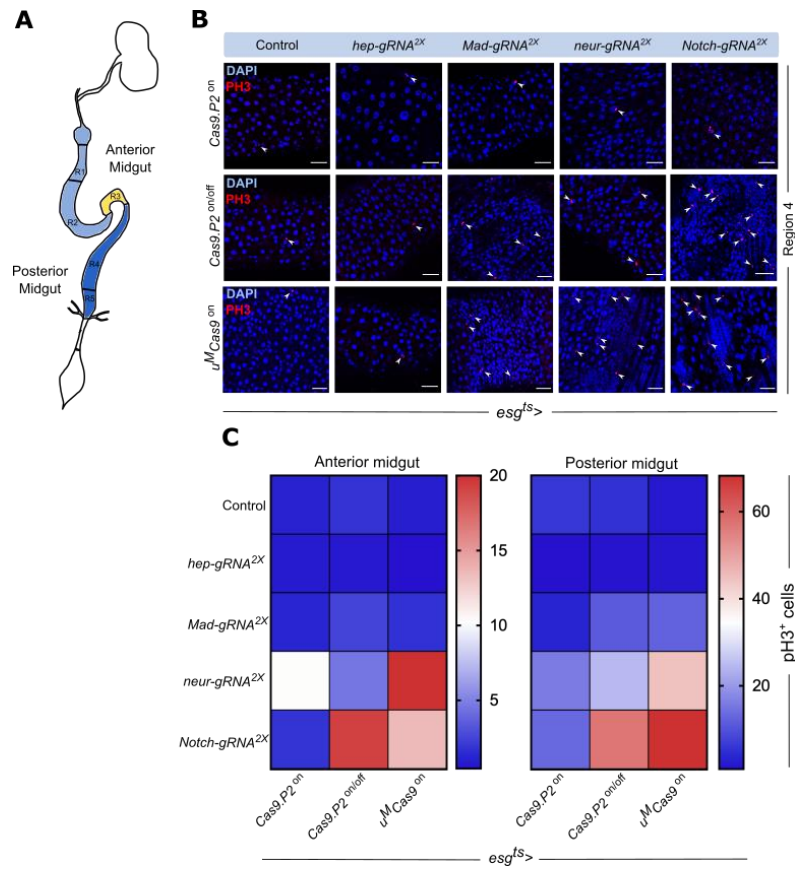

**Figure S3.** *Cas9.P2<sup>on/off</sup>* and *u<sup>M</sup>Cas9<sup>on</sup>* mediated perturbations of tumor suppressors increase the number of mitotic cells in the intestine. (C) Mitotic cells are marked with pH3 (red) and increase after *Cas9.P2<sup>on/off</sup>* and *u<sup>M</sup>Cas9<sup>on</sup>* mediated perturbation of *Mad*, *neur* and *Notch*. (D) Heatmap showing the number of pH3<sup>+</sup> cells in both the anterior and posterior regions of the intestine. Scale bar: 30  $\mu$ m.

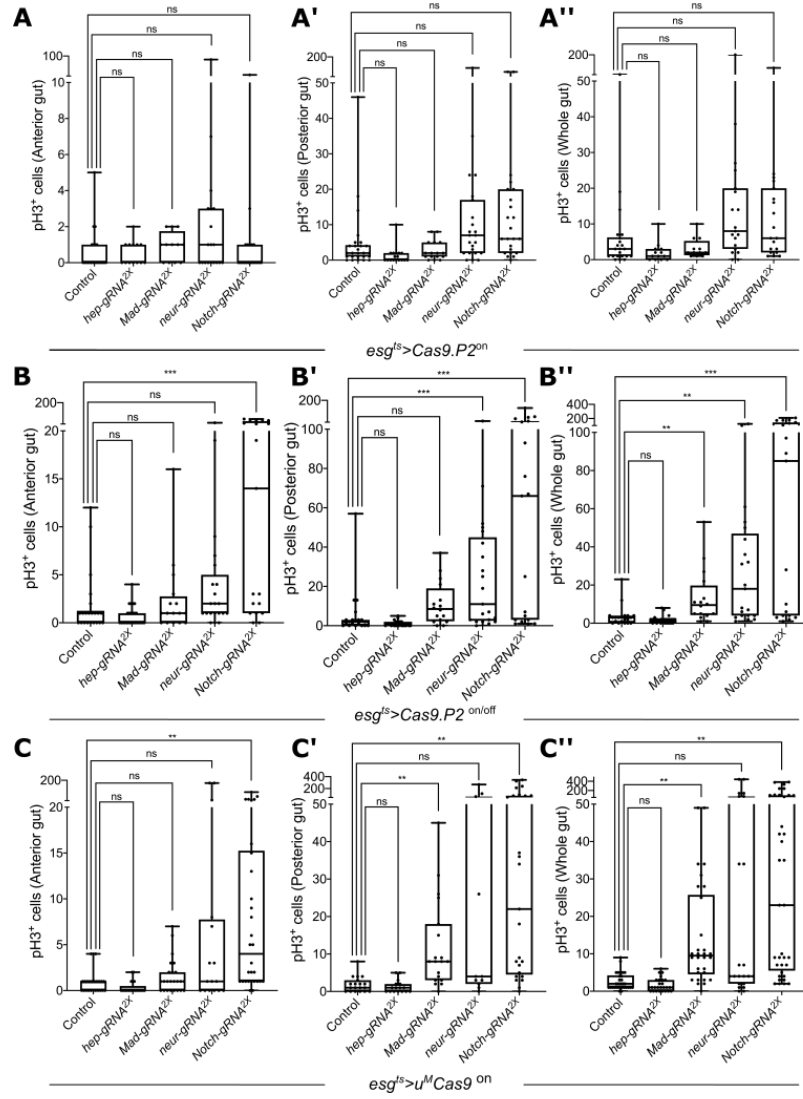

**Figure S4.** Boxplot representation of pH3<sup>+</sup> cells after perturbation of the BMP, Notch and JNK pathways. (A-C) Quantification of pH3<sup>+</sup> cells with either *Cas9.P2<sup>on</sup>* (A, A', A''), *Cas9.P2<sup>on/off</sup>* (B, B', B'') and *u<sup>M</sup>Cas9<sup>on</sup>* (C, C', C'') with different gRNAs in the R2/R4 regions and the whole intestine.
